# Supplementary material for: Needle Tract Seeding after Endoscopic Ultrasound Tissue Acquisition of Pancreatic Lesions: A Systematic Review and Meta-Analysis
Source: MDPI journal article supplement (doi:10.3390/diagnostics12092113), 2022-08-31

## ONLINE SUPPLEMENT

Supplementary Table S1. Risk of bias assessment and quality of included studies.

| Observational studies <sup>a</sup> |  |           |               |         |                 |
|------------------------------------|--|-----------|---------------|---------|-----------------|
|                                    |  | Selection | Comparability | Outcome | Overall quality |
| Kitano 2022                        |  | ***       | NA            | **      | H               |
| Park 2022                          |  | **        | *             | **      | M               |
| Ngamruengphong 2013                |  | ***       | **            | **      | H               |
| Micames 2003                       |  | **        | *             | *       | L               |
| Yoon 2014                          |  | **        | *             | *       | H               |
| Ikezawa 2013                       |  | **        | *             | *       | L               |
| Maruta 2021                        |  | **        | *             | **      | M               |
| Nakatsubo 2021                     |  | **        | NA            | *       | L               |
| Suzuki 2018                        |  | **        | *             | **      | M               |
| Tsutsumi 2016                      |  | ***       | **            | **      | H               |

L, low; H, high; U, unclear; M, moderate.

<sup>a</sup> Study quality assessment performed by means of Newcastle/Ottawa scale (each asterisk represents if the respective criterion within the subsection was satisfied)

**Supplementary Figure S1. Leave-one-out analysis of pooled incidence of needle tract seeding after exclusion of the study by Kitano et al**

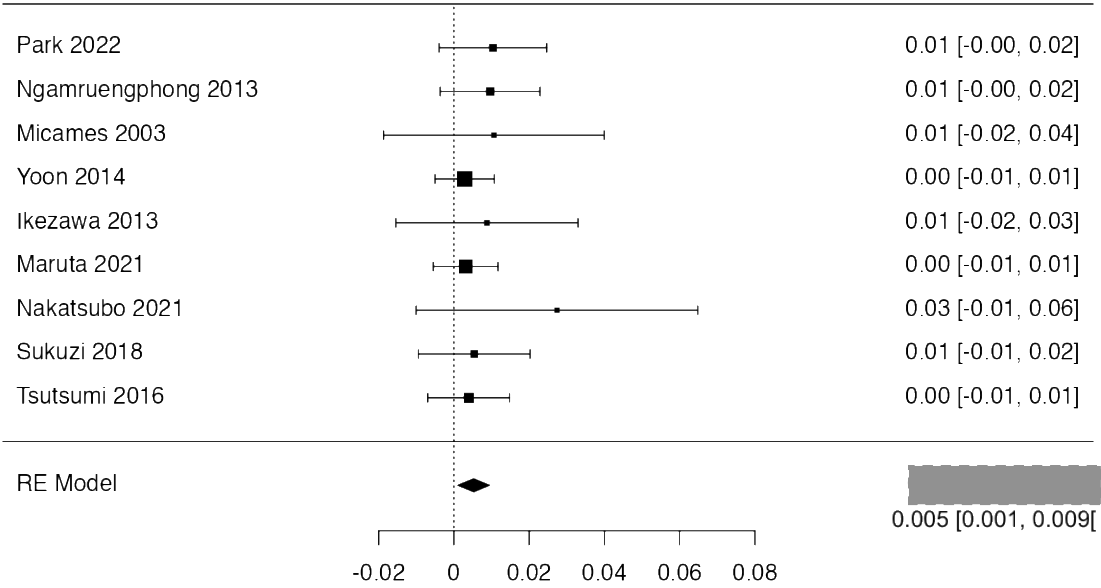

**Supplementary Figure S2. Pooled rates of needle tract seeding in patients with pancreatic adenocarcinoma**

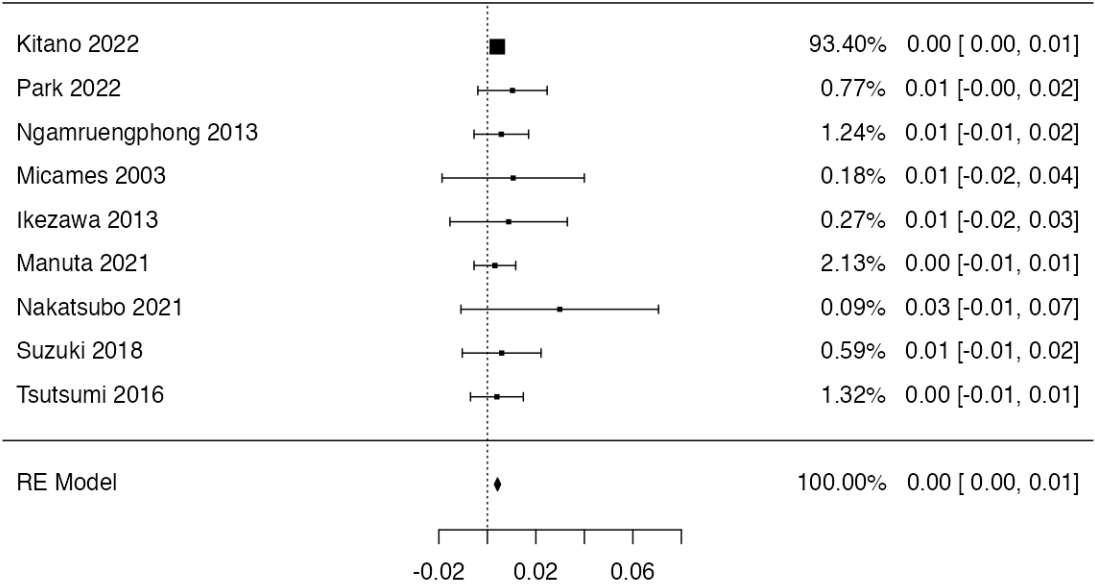

**Supplementary Figure S3. Pooled rates of needle tract seeding in patients with pancreatic cysts**

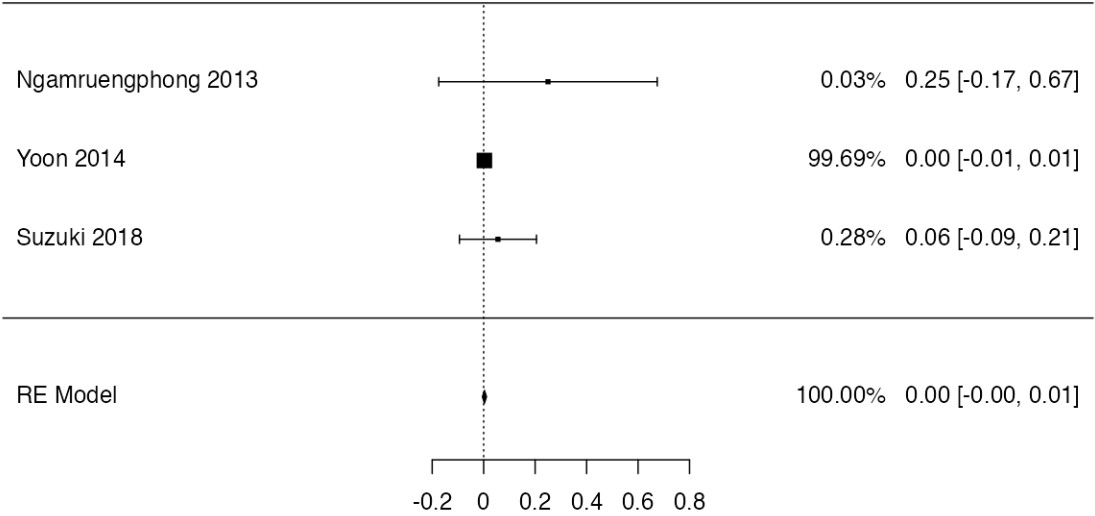

**Supplementary Figure S4. Funnel plot concerning the comparison between EUS-FNA vs non-FNA in terms of peritoneal dissemination**

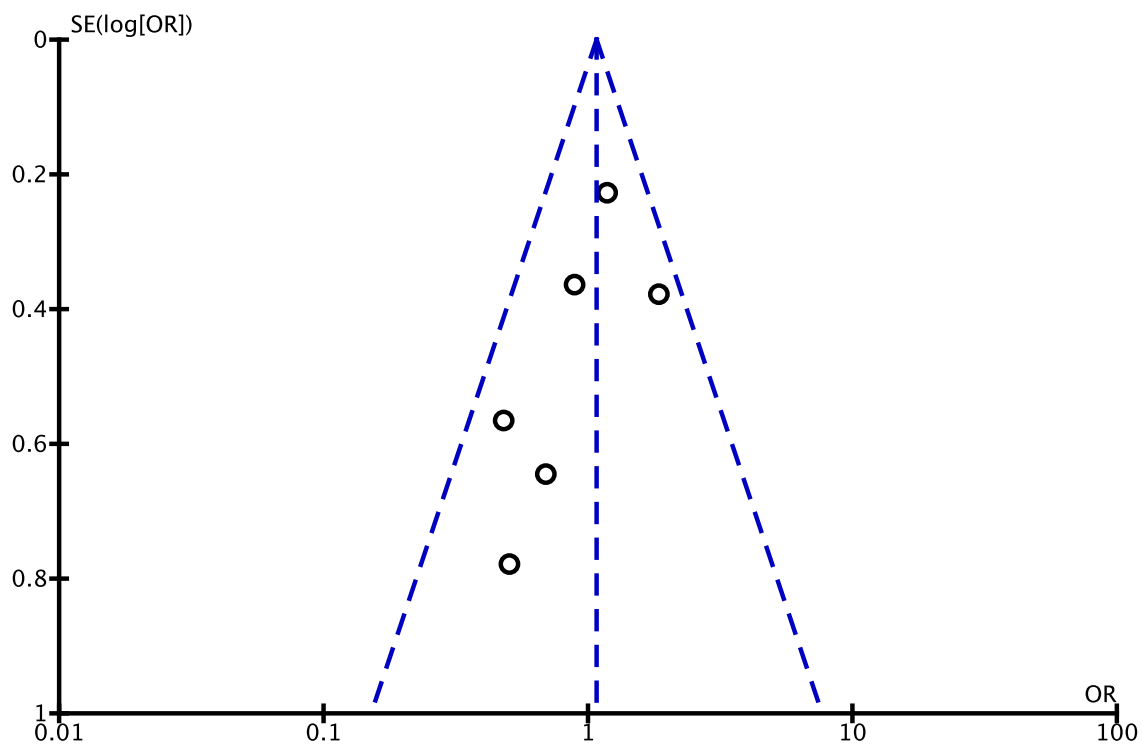

Supplement: s1 [file s1]
